# Supplementary material
Source: publisher figshare collection journal article supplement (https://acs.figshare.com/ndownloader/files/5712981)
Supplement: Supplementary file 1 [file 5712981]

# ic981391+.cif

CIF data of lambda-(+)CD/563-trans(O)-[Co(edtda)(en)]+ (1)
#------------------------------------------------------------------------------
_computing_data_collection            'Enraf Nonius CAD4 Diffractometer'
_computing_cell_refinement            'Enraf Nonius CAD4 Diffractometer '
_computing_data_reduction             'teXsan'
_computing_structure_solution          MolEN
_computing_structure_refinement       'teXsan'
_computing_publication_material       'teXsan'
_computing_molecular_graphics          ?
#------------------------------------------------------------------------------
_chemical_formula_weight               380.76
_chemical_formula_sum                  'C8 H18 Cl Co N2 O5 S2 '
_chemical_formula_moiety               'C8 H18 Cl Co N2 O5 S2 '

_cell_length_a                         6.788(1)
_cell_length_b                         12.799(1)
_cell_length_c                         16.999(2)
_cell_volume                           1477.0(3)
_cell_formula_units_Z                  4
_cell_measurement_temperature          296
_cell_measurement_reflns_used          25
_cell_measurement_theta_min            8.0
_cell_measurement_theta_max            10.0

_symmetry_cell_setting                 orthorhombic
_symmetry_space_group_name_H-M        'P 212121        '
_symmetry_Int_Tables_number            19
_symmetry_space_group_name_Hall        ?
loop_

#------------------------------------------------------------------------------
_exptl_crystal_description            'unknown'
_exptl_crystal_colour                 'purple'
_exptl_crystal_size_max                0.38
_exptl_crystal_size_mid                0.30
_exptl_crystal_size_min                0.25
_exptl_crystal_density_diffrn          1.71
_exptl_crystal_density_meas            'not measured'
_exptl_crystal_F_000                   784.00
_exptl_absorpt_coefficient_mu          1.63
_exptl_absorpt_correction_type        none

_diffrn_ambient_temperature            296
_diffrn_radiation_wavelength           0.7107
_diffrn_radiation_type                'Mo K\a'
_diffrn_radiation_source              ' Enraf Nonius sealed tube'
_diffrn_radiation_monochromator        graphite
_diffrn_radiation_detector            'scintillation counter'
_diffrn_measurement_device            'Enraf Nonius CAD4'
_diffrn_measurement_method             '\w-\2q scan'
_diffrn_standards_number              3
_diffrn_standards_interval_count      2 h
_diffrn_standards_decay_%             0.00

_diffrn_reflns_number                  1538
_reflns_number_total                   1538
_reflns_number_observed                1502
_reflns_observed_criterion             >3.0sigma(I)
_diffrn_reflns_av_R_equivalents        0.00
_diffrn_reflns_av_sigmaI/netI          ?
_diffrn_reflns_limit_h_min             0
_diffrn_reflns_limit_h_max             8
_diffrn_reflns_limit_k_min             0
_diffrn_reflns_limit_k_max             15
_diffrn_reflns_limit_l_min             0
_diffrn_reflns_limit_l_max             20
_diffrn_reflns_theta_min               1.00
_diffrn_reflns_theta_max               50.00
_diffrn_reflns_reduction_process      'Lp corrections applied'
#------------------------------------------------------------------------------
loop_
_atom_site_label
_atom_site_fract_x
_atom_site_fract_y
_atom_site_fract_z
_atom_site_B_iso_or_equiv   B=(8p2/3)  Uij ai*aj*aiaj
_atom_site_thermal_displace_type
_atom_site_calc_flag
_atom_site_calc_attached_atom
_atom_site_occupancy
_atom_site_refinement_flags

        Co      0.0483(1)       0.97416(6)      0.42228(4)        1.47(1)  
Bani . 1.00 .
        S(1)    -0.2523(2)      1.0214(1)       0.46564(9)      2.09(3)  
Bani . 1.00 .
        S(2)    0.1764(3)       0.9858(1)       0.54427(9)      2.45(3)  
Bani . 1.00 .
        O(1)    0.0974(7)       1.1176(3)       0.4010(3)       2.23(9)  
Bani . 1.00 .
        O(2)    -0.0004(9)      1.2812(3)       0.3956(3)       3.5(1)  
Bani . 1.00 .
        O(3)    0.0046(7)       0.8304(3)       0.4425(2)       1.97(8)  
Bani . 1.00 .
        O(4)    0.0233(8)       0.6930(4)       0.5190(3)       3.3(1)  
Bani . 1.00 .
        N(1)    0.3052(8)       0.9407(4)       0.3755(3)       2.1(1)  
Bani . 1.00 .
        N(2)    -0.0552(8)      0.9520(4)       0.3166(3)       2.0(1)  
Bani . 1.00 .
        C(1)    -0.029(1)       1.1895(5)       0.4122(4)       2.2(1)  
Bani . 1.00 .
        C(2)    -0.230(1)       1.1607(5)       0.4475(4)       2.5(1)  
Bani . 1.00 .
        C(3)    -0.222(1)       1.0153(6)       0.5716(4)       3.0(1)  
Bani . 1.00 .
        C(4)    -0.020(1)       1.0512(5)       0.5976(4)       3.2(2)  
Bani . 1.00 .
        C(5)    0.137(1)        0.8509(5)       0.5727(4)       2.6(1)  
Bani . 1.00 .
        C(6)    0.049(1)        0.7863(5)       0.5076(4)       2.2(1)  
Bani . 1.00 .
        C(7)    0.271(1)        0.8860(6)       0.3007(4)       2.7(1)  
Bani . 1.00 .
        C(8)    0.112(1)        0.9469(6)       0.2603(4)       2.7(1)  
Bani . 1.00 .
        Cl              -0.0912(3)      0.8923(2)       0.7660(1)      
3.16(4)   Bani . 1.00 .
        O(1w)   0.739(1)        0.7792(5)       0.2384(4)       5.6(2  
Bani . 1.00 .
        H1(N1)  0.378   0.897   0.410   5   Biso calc . 1.00
        H2(N1)  0.377   1.003   0.366   5   Biso calc . 1.00
        H1(N2)  -0.140  1.008   0.303   5   Biso calc . 1.00
        H1(N2)  -0.127  0.888   0.315   5   Biso calc . 1.00
        H1(C2)  -0.246  1.197   0.496   5   Biso calc . 1.00
        H2(C2)  -0.330  1.181   0.412   5   Biso calc . 1.00
        H1(C3)  -0.241  0.945   0.588   5   Biso calc . 1.00
        H2(C3)  -0.319  1.059   0.595   5   Biso calc . 1.00
        H1(C4)  -0.010  1.124   0.589   5   Biso calc . 1.00
        H2(C4)  -0.006  1.037   0.652   5   Biso calc . 1.00
        H1(C5)  0.051   0.849   0.617   5   Biso calc . 1.00
        H2(C5)  0.260   0.821   0.587   5   Biso calc . 1.00
        H1(C7)  0.230   0.816   0.310   5   Biso calc . 1.00
        H2(C7)  0.388   0.886   0.270   5   Biso calc . 1.00
        H1(C8)  0.157   1.015   0.248   5   Biso calc . 1.00
        H2(C8)  0.072   0.912   0.213   5   Biso calc . 1.00

loop_
_atom_site_aniso_label
_atom_site_aniso_U_11
_atom_site_aniso_U_22
_atom_site_aniso_U_33
_atom_site_aniso_U_12
_atom_site_aniso_U_13
_atom_site_aniso_U_23
 Co     0.0188(3)       0.0188(3)       0.0181(3)       -0.0015(4)     
0.0008(4)       0.0021(3)
S(1)    0.0241(7)       0.0257(7)       0.0295(7)       0.0012(8)      
0.0038(7)       0.0012(7)
S(2)    0.0336(8)       0.0369(8)       0.0225(7)       -0.0057(9)     
-0.0061(7)      0.0012(7)
O(1)    0.029(2)        0.022(2)        0.034(2)        -0.004(2)      
0.000(2)        0.003(2)
O(2)    0.059(4)        0.019(2)        0.054(3)        -0.004(2)      
0.000(3)        0.003(2)
O(3)    0.026(2)        0.023(2)        0.027(2)        -0.003(2)      
-0.000(2)       0.005(2)
O(4)    0.041(3)        0.030(2)        0.053(3)        -0.005(3)      
0.001(3)        0.018(2)
N(1)    0.019(3)        0.029(3)        0.032(3)        0.000(2)       
0.001(2)        0.007(2)
N(2)    0.025(3)        0.028(3)        0.021(2)        0.002(3)       
-0.004(3)       -0.000(2)
C(1)    0.040(4)        0.025(3)        0.019(3)        -0.006(3)      
-0.006(3)       -0.003(3)
C(2)    0.038(4)        0.024(3)        0.032(3)        0.005(3)       
0.003(3)        0.001(3)
C(3)    0.048(4)        0.037(3)        0.029(3)        0.014(4)       
0.014(3)        0.008(3)
C(4)    0.064(5)        0.036(3)        0.023(3)        0.010(4)       
-0.003(4)       -0.004(3)
C(5)    0.038(4)        0.034(3)        0.028(3)        0.012(3)       
0.001(3)        0.008(3)
C(6)    0.020(3)        0.029(3)        0.033(3)        0.002(3)       
0.006(3)        0.008(3)
C(7)    0.034(4)        0.039(4)        0.030(3)        0.004(4)       
0.011(3)        -0.001(3)
C(8)    0.034(4)        0.045(4)        0.022(3)        -0.003(3)      
0.002(3)        -0.004(3)
Cl      0.038(1)        0.0429(9)       0.0389(8)       0.0081(9)      
0.0089(8)       -0.0048(8)
O(1w)   0.073(4)        0.065(3)        0.076(4)        -0.032(4)      
0.022(4)        -0.032(3)

#------------------------------------------------------------------------------
_refine_ls_structure_factor_coef       F
_refine_ls_matrix_type                 full
_refine_ls_weighting_scheme            'w = 1/[\s^2^(Fo) + 0.00000|Fo|^2^]'
_refine_ls_hydrogen_treatment          noref
_refine_ls_extinction_method           none
_refine_ls_extinction_coef             ?
_refine_ls_abs_structure_details       ?
_refine_ls_abs_structure_Flack         ?
_refine_ls_number_reflns               1502
_refine_ls_number_parameters           172
_refine_ls_number_restraints           0
_refine_ls_number_constraints          0
_refine_ls_R_factor_all                ?
_refine_ls_R_factor_obs                0.035
_refine_ls_wR_factor_all               ?
_refine_ls_wR_factor_obs               0.050
_refine_ls_goodness_of_fit_all         ?
_refine_ls_goodness_of_fit_obs         ?
_refine_ls_shift/esd_max               0.02
_refine_ls_shift/esd_mean              0.0050
_refine_diff_density_min                0.00
_refine_diff_density_max               0.50
#------------------------------------------------------------------------------
loop_
_geom_bond_atom_site_label_1
_geom_bond_atom_site_label_2
_geom_bond_distance
_geom_bond_site_symmetry_1
_geom_bond_site_symmetry_2
_geom_bond_publ_flag
        Co       S(1)   2.252(2)   1_555 1_555 yes      
        Co       S(2)   2.253(2)   1_555 1_555 yes      
        Co       O(1)   1.901(4)   1_555 1_555 yes      
        Co       O(3)   1.895(4)   1_555 1_555 yes      
        Co       N(1)   1.964(6)   1_555 1_555 yes      
        Co       N(2)   1.950(5)   1_555 1_555 yes      
        S(1)     C(2)   1.816(7)   1_555 1_555 yes      
        S(1)     C(3)   1.814(7)   1_555 1_555 yes      
        S(2)     C(4)   1.817(8)   1_555 1_555 yes      
        S(2)     C(5)   1.812(7)   1_555 1_555 yes      
        O(1)     C(1)   1.271(8)   1_555 1_555 yes
        O(2)     C(1)   1.221(7)   1_555 1_555 yes
        O(3)     C(6)   1.277(8)   1_555 1_555 yes
        O(4)     C(6)   1.222(8)   1_555 1_555 yes
        N(1)     C(7)   1.470(9)   1_555 1_555 yes
        N(2)     C(8)   1.484(9)   1_555 1_555 yes
        C(1)     C(2)   1.54(1)   1_555 1_555 yes
        C(3)     C(4)   1.51(1)   1_555 1_555 yes
        C(5)     C(6)   1.506(9)   1_555 1_555 yes
        C(7)     C(8)   1.50(1)   1_555 1_555 yes
#------------------------------------------------------------------------------
loop_
_geom_angle_atom_site_label_1
_geom_angle_atom_site_label_2
_geom_angle_atom_site_label_3
_geom_angle
_geom_angle_site_symmetry_1
_geom_angle_site_symmetry_2
_geom_angle_site_symmetry_3
_geom_angle_publ_flag

        S(1)     Co      S(2)   91.76(7)  1_555 1_555 1_555 yes 
        S(1)     Co      O(1)   87.8(1)  1_555 1_555 1_555 yes  
        S(1)     Co      O(3)   93.4(1)  1_555 1_555 1_555 yes  
        S(1)     Co      N(1)   174.6(2)  1_555 1_555 1_555 yes 
        S(1)     Co      N(2)   90.8(2)  1_555 1_555 1_555 yes  
        S(2)     Co      O(1)   92.5(1)  1_555 1_555 1_555 yes  
        S(2)     Co      O(3)   87.6(1)  1_555 1_555 1_555 yes  
        S(2)     Co      N(1)   92.5(2)  1_555 1_555 1_555 yes  
        S(2)     Co      N(2)   175.2(2)  1_555 1_555 1_555 yes 
        O(1)     Co      O(3)   178.8(2)  1_555 1_555 1_555 yes 
        O(1)     Co      N(1)   88.7(2)  1_555 1_555 1_555 yes  
        O(1)     Co      N(2)   91.6(2)  1_555 1_555 1_555 yes  
        O(3)     Co      N(1)   90.0(2)  1_555 1_555 1_555 yes  
        O(3)     Co      N(2)   88.3(2)  1_555 1_555 1_555 yes  
        N(1)     Co      N(2)   85.1(2)  1_555 1_555 1_555 yes  
        Co       S(1)    C(2)   97.6(3)  1_555 1_555 1_555 yes  
        Co       S(1)    C(3)   102.2(3)  1_555 1_555 1_555 yes 
        Co       S(2)    C(4)   101.9(2)  1_555 1_555 1_555 yes
        Co       S(2)    C(5)   97.2(2)  1_555 1_555 1_555 yes
        C(4)     S(2)    C(5)   101.4(3)  1_555 1_555 1_555 yes
        Co       O(1)    C(1)   123.6(4)  1_555 1_555 1_555 yes
        Co       O(3)    C(6)   123.3(4)  1_555 1_555 1_555 yes
        Co       N(1)    C(7)   108.4(4)  1_555 1_555 1_555 yes
        Co       N(2)    C(8)   109.0(4)  1_555 1_555 1_555 yes
        O(1)     C(1)    O(2)   123.8(7)  1_555 1_555 1_555 yes
        O(1)     C(1)    C(2)   118.9(5)  1_555 1_555 1_555 yes
        O(2)     C(1)    C(2)   117.3(6)  1_555 1_555 1_555 yes
        S(1)     C(2)    C(1)   112.1(5)  1_555 1_555 1_555 yes
        S(1)     C(3)    C(4)   112.3(5)  1_555 1_555 1_555 yes
        S(2)     C(4)    C(3)   112.4(5)  1_555 1_555 1_555 yes
        S(2)     C(5)    C(6)   112.7(5)  1_555 1_555 1_555 yes
        O(3)     C(6)    O(4)   122.4(6)  1_555 1_555 1_555 yes
        O(3)     C(6)    C(5)   119.2(5)  1_555 1_555 1_555 yes
        O(4)     C(6)    C(5)   118.4(6)  1_555 1_555 1_555 yes
        N(1)     C(7)    C(8)   105.1(6)  1_555 1_555 1_555 yes
        N(2)     C(8)    C(7)   106.2(5)  1_555 1_555 1_555 yes
        Co       S(2)    C(4)   101.9(2)   1_555 1_555 1_555 yes
#------------------------------------------------------------------------------


CIF data of trans(C,O)-[Co(CH2S(CH2)2SCH2COO)(en)]+ (2)
#------------------------------------------------------------------------------
_computing_data_collection            'Enraf Nonius CAD4 Diffractometer'
_computing_cell_refinement            'Enraf Nonius CAD4 Diffractometer '
_computing_data_reduction             'teXsan'
_computing_structure_solution          MolEN
_computing_structure_refinement       'teXsan'
_computing_publication_material       'teXsan'
_computing_molecular_graphics          ?
#------------------------------------------------------------------------------
_chemical_formula_weight               382.73
_chemical_formula_sum                  'C7 H16 Cl Co N2 O6 S2 '
_chemical_formula_moiety               'C7 H16 Cl Co N2 O6 S2 '

_cell_length_a                         12.401(1)
_cell_length_b                         14.782(1)
_cell_length_c                         15.160(1)
_cell_volume                           2779.0(2)
_cell_formula_units_Z                  8
_cell_measurement_temperature          296
_cell_measurement_reflns_used          25
_cell_measurement_theta_min            11.0
_cell_measurement_theta_max            21.0

_symmetry_cell_setting                 orthorhombic
_symmetry_space_group_name_H-M        'P bca        '
_symmetry_Int_Tables_number            61
_symmetry_space_group_name_Hall        ?
loop_

#------------------------------------------------------------------------------
_exptl_crystal_description            'unknown'
_exptl_crystal_colour                 'violet'
_exptl_crystal_size_max                0.30
_exptl_crystal_size_mid                0.30
_exptl_crystal_size_min                0.25
_exptl_crystal_density_diffrn          1.83
_exptl_crystal_density_meas            'not measured'
_exptl_crystal_F_000                   1568.00
_exptl_absorpt_coefficient_mu          1.74
_exptl_absorpt_correction_type        none

_diffrn_ambient_temperature            296
_diffrn_radiation_wavelength           0.7107
_diffrn_radiation_type                'Mo K\a'
_diffrn_radiation_source              ' Enraf Nonius sealed tube'
_diffrn_radiation_monochromator        graphite
_diffrn_radiation_detector            'scintillation counter'
_diffrn_measurement_device            'Enraf Nonius CAD4'
_diffrn_measurement_method             '\w-\2q scan'
_diffrn_standards_number              3
_diffrn_standards_interval_count      2 h
_diffrn_standards_decay_%             0.00

_diffrn_reflns_number                  4519
_reflns_number_total                   4519
_reflns_number_observed                3058
_reflns_observed_criterion             >3.0sigma(I)
_diffrn_reflns_av_R_equivalents        0.00
_diffrn_reflns_av_sigmaI/netI          0.015
_diffrn_reflns_limit_h_min             0
_diffrn_reflns_limit_h_max             17
_diffrn_reflns_limit_k_min             0
_diffrn_reflns_limit_k_max             20
_diffrn_reflns_limit_l_min              0
_diffrn_reflns_limit_l_max             20
_diffrn_reflns_theta_min               1.00
_diffrn_reflns_theta_max               60.00
_diffrn_reflns_reduction_process      'Lp corrections applied'
#------------------------------------------------------------------------------
loop_
_atom_site_label
_atom_site_fract_x
_atom_site_fract_y
_atom_site_fract_z
_atom_site_B_iso_or_equiv$B!!!!(B B=(8p2/3)  Uij ai*aj*aiaj
_atom_site_thermal_displace_type
_atom_site_calc_flag
_atom_site_calc_attached_atom
_atom_site_occupancy
_atom_site_refinement_flags
        Co      0.32530(5)      0.37764(4)      0.06208(4)      1.64(1)  
Bani . 1.00 .
        S(1)    0.1508(1)       0.41025(9)      0.06657(9)      2.16(2)  
Bani . 1.00 .
        S(2)    0.3384(1)       0.3904(1)       0.20673(9)      2.74(3)  
Bani . 1.00 .
        O(1)    0.3427(3)       0.4956(2)       -0.0006(3)      2.29(7)  
Bani . 1.00 .
        O(2)    0.2705(4)       0.6264(3)       -0.0397(3)      3.39(9)  
Bani . 1.00 .
        N(1)    0.4806(4)       0.3568(3)       0.0462(3)       2.45(9)  
Bani . 1.00 .
        N(2)    0.3085(4)       0.3090(3)       -0.0492(3)      2.52(9)  
Bani . 1.00 .
        C(1)    0.2661(5)       0.5514(3)       -0.0018(4)      2.21(9)  
Bani . 1.00 .
        C(2)    0.1642(5)       0.5295(4)       0.0490(4)       3.0(1)  
Bani . 1.00 .
        C(3)    0.1158(5)       0.4024(4)       0.1826(4)       2.7(1)  
Bani . 1.00 .
        C(4)    0.2067(5)       0.4303(5)       0.2433(4)       3.2(1)  
Bani . 1.00 .
        C(5)    0.3155(5)       0.2849(4)       0.1539(4)       2.7(1)  
Bani . 1.00 .
        C(6)    0.4955(7)       0.2959(7)       -0.0302(6)      6.7(2)  
Bani . 1.00 .
        C(7)    0.4146(7)       0.2908(7)       -0.0864(6)      6.6(2)  
Bani . 1.00 .
        Cl      0.4143(1)       0.62858(9)      0.29180(9)      2.65(2) 
Bani . 1.00 .
        O(1c)   0.3602(5)       0.6192(5)       0.2101(4)       5.5(1)  
Bani . 1.00 .
        O(2c)   0.5240(4)       0.6031(5)       0.2795(5)       6.2(2)  
Bani . 1.00 .
        O(3c)   0.4070(5)       0.7215(3)       0.3220(4)       5.5(1)  
Bani . 1.00 .
        O(4c)   0.3674(6)       0.5663(4)       0.3541(4)       6.5(2)  
Bani . 1.00 .
        H1(N1)  0.5097  0.3295  0.0976  5   Biso calc . 1.00
        H2(N1)  0.5160  0.4127  0.0354  5   Biso calc . 1.00
        H1(N2)  0.2672  0.3435  -0.0898 5   Biso calc . 1.00
        H1(N2)  0.2727  0.2534  -0.0375 5   Biso calc . 1.00
        H1(C2)  0.1666  0.5591  0.1045  5   Biso calc . 1.00
        H2(C2)  0.1037  0.5505  0.0165  5   Biso calc . 1.00
        H1(C3)  0.0969  0.3415  0.1954  5   Biso calc . 1.00
        H2(C3)  0.0556  0.4405  0.1934  5   Biso calc . 1.00
        H1(C4)  0.2083  0.4945  0.2462  5   Biso calc . 1.00
        H2(C4)  0.1928  0.4063  0.3003  5   Biso calc . 1.00
        H1(C5)  0.3710  0.2408  0.1565  5   Biso calc . 1.00
        H2(C5)  0.2476  0.2564  0.1627  5   Biso calc . 1.00
        H1(C6)  0.5082  0.2367  -0.0079 5   Biso calc . 1.00
        H2(C6)  0.5571  0.3160  -0.0617 5   Biso calc . 1.00
        H1(C7)  0.4272  0.3334  -0.1321 5   Biso calc . 1.00
        H2(C7)  0.4137  0.2315  -0.1105 5   Biso calc . 1.00


loop_
_atom_site_aniso_label
_atom_site_aniso_U_11
_atom_site_aniso_U_22
_atom_site_aniso_U_33
_atom_site_aniso_U_12
_atom_site_aniso_U_13
_atom_site_aniso_U_23
Co      0.0226(3)       0.0157(2)       0.0240(3)       -0.0017(3)     
0.0004(3)       0.0017(3)
S(1)    0.0231(5)       0.0280(6)       0.0309(6)       -0.0042(5)     
-0.0007(5)      0.0044(5)
S(2)    0.0323(6)       0.0439(7)       0.0277(6)       -0.0025(6)     
-0.0054(6)      0.0009(6)
O(1)    0.031(2)        0.016(1)        0.039(2)        -0.001(1)      
0.008(2)        0.006(1)
O(2)    0.049(2)        0.028(2)        0.051(2)        0.005(2)       
0.012(2)        0.014(2)
N(1)    0.025(2)        0.030(2)        0.038(2)        0.001(2)       
0.003(2)        -0.000(2)
N(2)    0.039(2)        0.026(2)        0.030(2)        -0.003(2)      
-0.000(2)       -0.004(2)
C(1)    0.034(3)        0.019(2)        0.031(2)        0.000(2)       
0.002(2)        0.005(2)
C(2)    0.035(3)        0.025(2)        0.052(3)        0.008(2)       
0.011(3)        0.011(2)
C(3)    0.029(2)        0.038(3)        0.035(3)        -0.005(2)      
0.009(2)        0.004(2)
C(4)    0.041(3)        0.052(3)        0.028(3)        -0.002(3)      
0.006(3)        -0.004(3)
C(5)    0.041(3)        0.025(2)        0.037(3)        0.002(2)       
0.002(3)        0.010(2)
C(6)    0.053(4)        0.116(6)        0.084(5)        0.032(4)       
0.004(4)        -0.053(4)
C(7)    0.055(4)        0.131(7)        0.067(4)        -0.022(5)      
0.028(4)        -0.058(4)
Cl      0.0386(7)       0.0296(6)       0.0326(6)       -0.0004(6)     
-0.0018(6)      0.0005(6)
O(1c)   0.072(3)        0.085(4)        0.051(3)        0.004(3)       
-0.028(3)       0.001(3)
O(2c)   0.038(3)        0.092(4)        0.105(5)        0.016(3)       
-0.006(3)       0.009(4)
O(3c)   0.085(4)        0.031(2)        0.091(4)        -0.002(3)      
-0.004(4)       -0.017(3)
O(4c)   0.138(5)        0.064(3)        0.043(3)        -0.030(4)      
0.030(3)        0.007(3)
 
#------------------------------------------------------------------------------
_refine_ls_structure_factor_coef       F
_refine_ls_matrix_type                 full
_refine_ls_weighting_scheme            'w = 1/[\s^2^(Fo) + 0.00000|Fo|^2^]'
_refine_ls_hydrogen_treatment          noref
_refine_ls_extinction_method           none
_refine_ls_extinction_coef             ?
_refine_ls_abs_structure_details       ?
_refine_ls_abs_structure_Flack         ?
_refine_ls_number_reflns               3058
_refine_ls_number_parameters           172
_refine_ls_number_restraints           0
_refine_ls_number_constraints          0
_refine_ls_R_factor_all                ?
_refine_ls_R_factor_obs                0.049
_refine_ls_wR_factor_all               ?
_refine_ls_wR_factor_obs               0.065
_refine_ls_goodness_of_fit_all         ?
_refine_ls_goodness_of_fit_obs         ?
_refine_ls_shift/esd_max               0.03
_refine_ls_shift/esd_mean              0.0050
_refine_diff_density_min               0.00
_refine_diff_density_max               1.18
#------------------------------------------------------------------------------
loop_
_geom_bond_atom_site_label_1
_geom_bond_atom_site_label_2
_geom_bond_distance
_geom_bond_site_symmetry_1
_geom_bond_site_symmetry_2
_geom_bond_publ_flag
        Co       S(1)   2.219(1)   1_555 1_555 yes
        Co       S(2)   2.207(2)   1_555 1_555 yes
        Co       O(1)   1.997(4)   1_555 1_555 yes
        Co       N(1)   1.965(5)   1_555 1_555 yes
        Co       N(2)   1.979(5)   1_555 1_555 yes
        Co       C(5)   1.957(6)   1_555 1_555 yes
        S(1)     C(2)   1.791(6)   1_555 1_555 yes
        S(1)     C(3)   1.815(6)   1_555 1_555 yes
        S(2)     C(4)   1.824(7)   1_555 1_555 yes
        S(2)     C(5)   1.777(6)   1_555 1_555 yes
        O(1)     C(1)   1.259(7)   1_555 1_555 yes
        O(2)     C(1)   1.250(7)   1_555 1_555 yes
        N(1)     C(6)   1.48(1)   1_555 1_555 yes
        N(2)     C(7)   1.46(1)   1_555 1_555 yes
        C(1)     C(2)   1.514(9)   1_555 1_555 yes
        C(3)     C(4)   1.512(9)   1_555 1_555 yes
        C(6)     C(7)   1.32(1)   1_555 1_555 yes
        Cl       O(1c)  1.416(6)   1_555 1_555 yes
        Cl       O(2c)  1.424(6)   1_555 1_555 yes
        Cl       O(3c)  1.450(5)   1_555 1_555 yes
        Cl       O(4c)  1.442(6)   1_555 1_555 yes

#
loop_
_geom_angle_atom_site_label_1
_geom_angle_atom_site_label_2
_geom_angle_atom_site_label_3
_geom_angle
_geom_angle_site_symmetry_1
_geom_angle_site_symmetry_2
_geom_angle_site_symmetry_3
_geom_angle_publ_flag
        S(1)     Co      S(2)   91.31(6)  1_555 1_555 1_555 yes
        S(1)     Co      O(1)   86.0(1)  1_555 1_555 1_555 yes
        S(1)     Co      N(1)   173.7(2)  1_555 1_555 1_555 yes
        S(1)     Co      N(2)   92.0(2)  1_555 1_555 1_555 yes
        S(1)     Co      C(5)   94.0(2)  1_555 1_555 1_555 yes
        S(2)     Co      O(1)   113.0(1)  1_555 1_555 1_555 yes
        S(2)     Co      N(1)   93.6(2)  1_555 1_555 1_555 yes
        S(2)     Co      N(2)   154.0(1)  1_555 1_555 1_555 yes
        S(2)     Co      C(5)   50.1(2)  1_555 1_555 1_555 yes
        O(1)     Co      N(1)   88.4(2)  1_555 1_555 1_555 yes
        O(1)     Co      N(2)   93.0(2)  1_555 1_555 1_555 yes
        O(1)     Co      C(5)   163.0(2)  1_555 1_555 1_555 yes
        N(1)     Co      N(2)   85.3(2)  1_555 1_555 1_555 yes
        N(1)     Co      C(5)   92.2(2)  1_555 1_555 1_555 yes
        N(2)     Co      C(5)   103.9(2)  1_555 1_555 1_555 yes
        Co       S(1)    C(2)   96.8(2)  1_555 1_555 1_555 yes
        Co       S(1)    C(3)   104.4(2)  1_555 1_555 1_555 yes
        C(2)     S(1)    C(3)   103.3(3)  1_555 1_555 1_555 yes
        Co       S(2)    C(4)   105.3(2)  1_555 1_555 1_555 yes
        Co       S(2)    C(5)   57.6(2)  1_555 1_555 1_555 yes
        C(4)     S(2)    C(5)   106.1(3)  1_555 1_555 1_555 yes
        Co       O(1)    C(1)   119.8(4)  1_555 1_555 1_555 yes
        Co       N(1)    C(6)   108.3(4)  1_555 1_555 1_555 yes
        Co       N(2)    C(7)   109.3(5)  1_555 1_555 1_555 yes
        O(1)     C(1)    O(2)   123.7(5)  1_555 1_555 1_555 yes
        O(1)     C(1)    C(2)   118.9(5)  1_555 1_555 1_555 yes
        O(2)     C(1)    C(2)   117.4(5)  1_555 1_555 1_555 yes
        S(1)     C(2)    C(1)   111.3(4)  1_555 1_555 1_555 yes
        S(1)     C(3)    O(4)   113.2(4)  1_555 1_555 1_555 yes
        S(2)     C(4)    C(3)   113.2(4)  1_555 1_555 1_555 yes
        Co       C(5)    S(2)   72.3(2)  1_555 1_555 1_555 yes
        N(1)     C(6)    C(7)   116.5(8)  1_555 1_555 1_555 yes
        N(2)     C(7)    C(6)   115.2(7)  1_555 1_555 1_555 yes
        O(1c)    Cl      O(2c)  108.2(4)  1_555 1_555 1_555 yes
        O(1c)    Cl      O(3c)  109.8(4)  1_555 1_555 1_555 yes
        O(1c)    Cl      O(4c)  108.7(4)  1_555 1_555 1_555 yes
        O(2c)    Cl      O(3c)  110.6(4)  1_555 1_555 1_555 yes
        O(2c)    Cl      O(4c)  107.6(4)  1_555 1_555 1_555 yes
        O(3c)    Cl      O(4c)  111.9(4)  1_555 1_555 1_555 yes

#------------------------------------------------------------------------------
